# Supplementary material for: Japan Society of Gynecologic Oncology guidelines 2015 for the treatment of vulvar cancer and vaginal cancer
Source: Int J Clin Oncol. 2017 Nov 20;23(2):201–34. doi: 10.1007/s10147-017-1193-z (PMC5882649; doi:10.1007/s10147-017-1193-z)
Supplement: Supplementary file 2 — Supplementary material 2 (XLSX 19 kb) [file 10147_2017_1193_MOESM2_ESM.xlsx]

## Sheet: Sheet1
		Chapter 5■ Appendix
		List of Adverse Events for Antineoplatic Agnets (Excerpted from pharmaceutical interview form)
		General	Number of cases	Incidence of adverse event	Blood			Gastrointestinal tract				Liver	Kidneys	Respiratory organs	Nervous system	Appendages of the skin	Other adverse events and points of caution
		(Product name)			Leukopenia	Reduction in hemoglobin	Thrombo-	Nausea and vomiting	Loss of appetite	Diarrhea	Stomach pain	Elevated AST/ALT	Elevated BUN/Cr	Interstitial pneumonia	Peripheral neuropathy	Hair loss
							cytopenia					Damage to liver function	Reduction in Ccr
		Cisplatin	Post-marketing product surveillance at time of approval	0.856	0.365	0.28	0.17	0.746	0.622	0.059	0.005	9.4%/9.8%	14.3%/6.6%	Less than 0.1%	0.017	0.257	Hearing disorders (1.4%), visual disorders (papilledema, retrobulbar neuritis, cortical blindness: less than 0.1%), stroke (less than 0.1%)
		(Briplatin)	8, 787 cases									─	0.141
		Carboplatin	Post-marketing product surveillance at time of approval	0.86	0.564	0.401	0.427	0.505	0.454	0.033	0.022	9.2%/10.2%	5.1%/2.6%	0.001	0.004	0.183	Stroke (0.08%), anaphylaxis (0.03%), myocardial infarction (0.02%)
		(Paraplatin)	6, 218 cases									─	0.036
		Fluorouracil	Post-marketing product surveillance at time of approval	─	0.079	0.007	0.024	0.082	0.152	0.123	0.006	─	─	─	─	0.038	Mouth ulcer (6.7%), pigmentation (4.8%), dehydration from violent diarrhea, some reports of serious hematologic disorder caused by concurrent use of the antiviral drug sorivudine
		(5-fluorouracil)	1, 936 cases
		Bleomycin	Post-marketing product surveillance at time of approval	─	0.002	0.001	─	0.146	0.287	0.009	─	─	─	0.102	─	0.295	Hardening of the skin, pigmentation (40.6%), fever (39.8%), mouth ulcer (13.3%); special care required for patients 60 or older regarding interstitial pneumonia and pulmonary fibrosis. Total dosage: 300mg or less
		(Bleo)	1, 613 cases									0.002
		Mitomycin C	Post-marketing product surveillance at time of reevaluation	─	0.402	0.03	0.247	0.154	0.218	─	─	─	─	─	─	0.009	Hemolytic-uremic syndrome, microangiopathic hemolytic anemia (frequency unknown)
		(Mitomycin)	329 cases
		Pirarubicin	Post-marketing product surveillance at time of approval	0.712	0.504	0.138	0.145	0.319	0.364	0.025	0.001	2.6%/3.2%	0.8%/0.3%	Less than 0.1%	─	0.215	Myocardial disorder (00.1% or more but less than 5%), abnormal ECG (1.6%), special care required regarding congestive heart failure if total dosage is 950mg/m2 or more
		(Pinorubin, Pirarubicin, Therarubicin)	3, 591 cases									0.005	0.001
		Vincristine	At time of approval	─	5% or more	5% or more	0.1% or more but less than 5%	5% or more	0.1% or more but less than 5%	0.1% or more but less than 5%	5% or more	5% or more	─	─	0.332	0.219	Deep hyporeflexia/areflexia in the legs (10.7%), pain in extremities (3.2%), muscle atrophy (2.1%), difficulty in urination (1.1%), mouth ulcer, fever, perspiration (5% or more); contraindication for demyelinating Charcot-Marie-Tooth disease
		(Oncovin)	187 cases												(Numbness)
		Paclitaxel	Post-marketing product surveillance at time of approval	0.827	0.466	0.139	0.086	0.193	0.058	0.046	0.011	6.6%/7.69%	2.7%/1.1%	0.006	0.348	0.282	Joint pain (21.4%), muscle pain (16. 8%), fever (10.6%), anaphylaxis (0.3%), stroke (0.03%), myocardial infarction (0.03%)
		(Taxol)	3, 669 cases									0.034	0.004
		Methotrexate (Rheumatrex Dose Pack, Trexall)	Post-marketing product surveillance at time of approval	0.77	0.139	0.053	0.098	0.499	0.597	0.103	0.035	16.8%/19.0%	0.9%/0.7%	─	0.005	0.085	Fever (13.3%), rash/red spots (4.0%), mouth ulcer (10.9%), headache (2.1%)
			2, 341 cases									─	─
		Dacarbazine	Post-marketing product surveillance at time of approval	0.787	─	─	─	0.309	0.051	0.1% or more but less than 5%	0.1% or more but less than 5%	─/─	─/─	─	─	0.1% or more but less than 5%	Angialgia (8.2%), anaphylaxis , hepatic necrosis, myelosuppression, facial paresthesia, photosensitive epilepsy
		(DTIC, DTIC-Dome)	940 cases									0.061	0.1% or more but less than 5%
		Mitoxantrone	Post-marketing product surveillance at time of approval	0.677	0.545	0.263	0.324	0.269	0.19	0.1% or more but less than 5%	0.1% or more but less than 5%	─/─	─/─	─	─	5% or more	Congestive heart failure may occur if total dosage of this drug exceeds 160 mg/m2 (0.3%); myocardial disorder, anaphylaxis, arrhythmia
		(Novantrone)	1, 746 cases									5% or more	0.1% or more but less than 5%
		Vinorelbine	At time of approval	0.978	0.926	0.737	0.15	0.265	0.52	0.125	Less than 5%	─/─	─/─	0.014	─	0.269	General malaise (40.3%), electrolyte abnormality (20% or more), ileus (0.4%), acute renal failure (0.2%), anaphylaxis, syndrome of inappropriate secretion of antidiuretic hormone (SIADH)
		(Navelbine)	809 cases									Less than 5%	Less than 5%
		Nimustine(Nidran)	Post-marketing product surveillance	0.613	0.315	─	0.3	0.134	0.125	Less than 1%	─	─	─/─	─	─	1% or more but less than 10%	Fever (1% or more but less than 10%), general malaise (1% or more but less than 10%); secondary carcinogenesis, such as myelodysplastic syndrome and acute leukemia, may occur as a result of long-term administration.
			1, 970 cases										Less than 1%
		Interferon-alpha	At time of approval and at time of completion of re-evaluation	0.821	0.1% or more but less than 5%	0.1% or more but less than 5%	0.1% or more but less than 5%	0.012	0.082	0.018	0.1% or more but less than 5%	0.1% or more but less than 5%	0.1% or more but less than 5%	0.1% or more but less than 5%	Less than 0.1%	0.073	Fever (69.8%), general malaise (11.4%), headache (6.2%), joint pain (5.8%), depression (2.5%), muscle pain (2.5%), insomnia (1.6%), chills and shivering (1.3%)
			4, 562 cases
		Interferon-beta	Post-marketing product surveillance	0.823	0.169	0.02	0.16	0.05	0.113	Less than 1%	Less than 1%	2.5%/2.5%	─/─	Less than 0.1%	Less than 1%	Less than 1%	Fever (72.0%), headache (18.6%), chills and shivering (16.5%), general malaise (15.1%), albuminuria (12.4%), hypoalbuminemia (4.2%)
			5, 380 cases									Less than 1%	Less than 1%
		Interleukin-2	At time of approval	0.86	0.012	0.023	0.008	0.198	0.36	0.031	0.012	10.1%/12.0%	1.9%/12.7%	─	0.07	0.003	Fever (73.3%), chills and shivering (40.0%), fatigue (35.0%), joint pain (6.2%), muscle pain (5.8%), weight gain (5.8%), edema (4.3%), pleural effusion (1.6%)
		(Aldesleukin, IL─2)	258 cases									0.163	0.035
		Nivolumab	At time of approval	0.857	0.171	─	─	─	─	─	─	14.3%/11.4%	─	0.029	─	─	Pruritus (31.4%), decrease in free triiodothyronine (22.9%), increase in TSH in the blood (20.0%), achromodermia (17.1%), decrease in free thyroxine (17.1%), hypothyroidism (14.3%), fatigue (14.3%), increase in Al-P in the blood (14.3%), increase in CK (CPK) in the blood (14.3%), increase in LDH in the blood (14.3%), increase in CRP (14.3%), decrease in lymphocyte count (14.3%), diarrhea (11.4%),…
		(Opdivo)	35 cases									0.057
		Imiquimod	At time of approval	0.828	─	─	─	─	─	─	─	─	─	─	─	─	Red spots (54.7%), inflammation (34.4%), epithelial exfoliation (32.8%), aching (28.1%),edema (17.2%)
		(Beselna cream)	64 cases
																	(“─” indicates incidence unknown or not indicated)
